# Supplementary material for: Habitat-based forage productivity and grazing dynamics in a heterogeneous wetland system
Source: Research Square preprint supplement (doi:10.21203/rs.3.rs-8647170/v1), 2026-01-30
Supplement: Supplementary file 1 [file 52c8f8d6dbea643bc28e17e2.docx]

Supplementary Table

**Table 1. Complete list of plant species recorded in the Kızılırmak Delta wetland.**

| **No** | **Plant species** | **Family** |
| --- | --- | --- |
| 1 | *Sambucus ebulus L.* | Adoxaceae |
| 2 | *Salicornia europaea* L. | Amaranthaceae |
| 3 | *Salicornia perennans* Wild. | Amaranthaceae |
| 4 | *Salsola tragus* L. subsp. *tragus* | Amaranthaceae |
| 5 | *Eryngium creticum* Lam. | Apiaceae |
| 6 | *Torilis nodosa* (L.) Gaertn. | Apiaceae |
| 7 | *Muscari neglectum* Guss. ex Ten. | Asparagaceae |
| 8 | *Ornithogalum orthophyllum* Ten subsp. *kochii* (Parl.) | Asparagaceae |
| 9 | *Ornithogalum sigmoideum* Freyn & Sint. | Asparagaceae |
| 10 | *Bellis perennis L.* | Asteraceae |
| 11 | *Centaurea iberica* Trev. ex Sprengel | Asteraceae |
| 12 | *Cichorium intybus L.* | Asteraceae |
| 13 | *Senecio vulgari*s L. | Asteraceae |
| 14 | *Taraxacum macrolepium* Schischk | Asteraceae |
| 15 | *Achillea millefolium* L. subsp. *millefolium* | Asteraceae |
| 16 | *Cynara cardunculu*s L. | Asteraceae |
| 17 | *Echinops spinosissimus* Turra subsp. *bithynicus* (Boiss.) | Asteraceae |
| 18 | *Scolymus hispanicus L.* | Asteraceae |
| 19 | *Silybum marianum* (L.) Gaertn. subsp. *marianum* | Asteraceae |
| 20 | *Helminthotheca echioides* (L.) Holub | Asteraceae |
| 21 | *Hypochaeris radicata L.* | Asteraceae |
| 22 | *Myosotis arvensis* (L.) Hill subsp. *arvensis* | Boraginaceae |
| 23 | *Capsella bursa-pastoris* (L.) Medik. | Brassicaceae |
| 24 | *Maresia nana* (DC.) Batt. | Brassicaceae |
| 25 | *Holosteum umbellatum* L. var. *umbellatum* | Caryophyllaceae |
| 26 | *Silene conica L.* | Caryophyllaceae |
| 27 | *Spergularia media* (L.) C.Presl | Caryophyllaceae |
| 28 | *Convolvulus arvensis L.* | Convolvulaceae |
| 29 | *Carex acutiformis* Ehrh. | Cyperaceae |
| 30 | *Cyperus capitatus* Vand. | Cyperaceae |
| 31 | *Euphorbia helioscopia* L. subsp. *helioscopia* | Euphorbiaceae |
| 32 | *Euphorbia paralias L.* | Euphorbiaceae |
| 33 | *Euphorbia maculata* L. | Euphorbiaceae |
| 34 | *Glycyrrhiza glabra* L. var. *glabra* | Fabaceae |
| 35 | *Lotus corniculatus* L. var. *tenuifolius* | Fabaceae |
| 36 | *Medicago lupulina L.* | Fabaceae |
| 37 | *Medicago minima* (L.) Bartal. var. *minima* | Fabaceae |
| 38 | *Trifolium campestre* Schreb. subsp. *campestre* var. | Fabaceae |
| 39 | *Trifolium repens* L. var. *repens* | Fabaceae |
| 40 | *Trifolium resupinatum* L. var. *resupinatum* | Fabaceae |
| 41 | *Trifolium pratense* L. var. *pratense* | Fabaceae |
| 42 | *Medicago polymorpha L.* | Fabaceae |
| 43 | *Centaurium erythraea* Rafn. subsp. *erythraea* | Gentianaceae |
| 44 | *Blackstonia perfoliata* (L.) Huds.subsp. *perfoliata* | Gentianaceae |
| 45 | *Erodium cicutarium* (L.) L Hér. subsp. *cicutarium* | Geraniaceae |
| 46 | *Geranium molle L.* | Geraniaceae |
| 47 | *Juncus bufonius L.* | Juncaceae |
| 48 | *Juncus acutus* L. subsp. *acutus* | Juncaceae |
| 49 | *Juncus articulatus* L. subsp. *articulatus* | Juncaceae |
| 50 | *Juncus heldreichianus* T.Marsson ex Parl. subsp. | Juncaceae |
| 51 | *Juncus inflexus* L. subsp. *inflexus* | Juncaceae |
| 52 | *Juncus littoralis* C.A.Mey. | Juncaceae |
| 53 | *Juncus maritimus* Lam. | Juncaceae |
| 54 | *Mentha pulegium L.* | Lamiaceae |
| 55 | *Linum bienne Mill.* | Linaceae |
| 56 | *Orchis laxiflora* Lam.subsp. *laxiflora* | Orchidaceae |
| 57 | *Spiranthes spiralis* (L.) Chevall | Orchidaceae |
| 58 | *Orobanche minor* Sm. | Orobanchaceae |
| 59 | *Orobanche ramosa L.* | Orobanchaceae |
| 60 | *Parentucellia latifolia* (L.) Caruel subsp. | Orobanchaceae |
| 61 | *Parentucellia viscosa* (L.) Caruel | Orobanchaceae |
| 62 | *Anagallis arvensis* L. var. *arvensis* | Plantaginaceae |
| 63 | *Anagallis arvensi*s L. var. *caerulea* (L.) Gouan | Plantaginaceae |
| 64 | *Plantago coronopus* (Guss.) Pilg. subsp. *commutata* | Plantaginaceae |
| 65 | *Plantago lanceolata L.* | Plantaginaceae |
| 66 | *Veronica chamaedrys L.* | Plantaginaceae |
| 67 | *Agrostis stolonifera L.* | Poaceae |
| 68 | *Briza minor L.* | Poaceae |
| 69 | *Catapodium rigidum* (L.) C.E.Hubb. | Poaceae |
| 70 | *Cynodon dactylon* (L.) Pers. var. *dactylon* | Poaceae |
| 71 | *Hordeum murinum* L. subsp. *glaucum* (Steud.) Tzvelev | Poaceae |
| 72 | *Lolium perenn*e L. | Poaceae |
| 73 | *Paspalum distichum L.* | Poaceae |
| 74 | *Poa pratensis L.* | Poaceae |
| 75 | *Polypogon monspeliensis* (L.) Desf. | Poaceae |
| 76 | *Lagurus ovatus L.* | Poaceae |
| 77 | *Ranunculus constantinopolitanus* (DC.) d’Urv. | Ranunculaceae |
| 78 | *Ranunculus marginatus* d’Urv. | Ranunculaceae |
| 79 | *Ranunculus trichophyllus* Chaix ex Vill. | Ranunculaceae |
| 80 | Paliurus spina-christi P. Mill. | Rhamnaceae |
| 81 | *Potentilla reptans L.* | Rosaceae |
| 82 | *Rubus caesius L.* | Rosaceae |
| 83 | *Rubus canescens* DC. var. *glabratus* (Godr.) Davis & | Rosaceae |
| 84 | *Rubus idaeus* L. subsp. *idaeus* | Rosaceae |
| 85 | *Rubus sanctus* Schreb. | Rosaceae |
| 86 | *Pyracantha coccinea* M.Roem. | Rosaceae |
| 87 | *Rosa canina L.* | Rosaceae |
| 88 | *Sherardia arvensis L.* | Rubiaceae |
| 89 | *Azolla filiculoides* Lam. | Salviniaceae |
| 90 | *Smilax excelsa L.* | Smilaceae |
| 91 | *Datura stramonium L.* | Solanaceae |
| 92 | *Allium scorodoprasum* L. subsp. *rotundum* (L.) Stearn | Amaryllidaceae |
| 93 | *Conium maculatum L.* | Apiaceae |
| 94 | *Eryngium maritimum L.* | Apiaceae |
| 95 | *Muscari armeniacum* Leichtlin ex Baker | Apiaceae |
| 96 | *Torilis nodosa* (L.) Gaertn. | Apiaceae |
| 97 | *Lapsana communis* L. subsp. *intermedia* (M. Bieb.) | Asteraceae |
| 98 | *Sonchus asper* (L.) Hill. subsp. *glaucescens* (Jord.) Ball | Asteraceae |
| 99 | *Cynoglossum creticum* Mill. | Boraginaceae |
| 100 | *Echium vulgare* L. subsp. *vulgare* | Boraginaceae |
| 101 | *Petrorhagia saxifraga* (L.) Link | Caryophyllaceae |
| 102 | *Silene dichotoma* Ehrh. subsp. *dichotoma* | caryophyllaceae |
| 103 | *Stellaria media* (L.) Vill. | Caryophyllaceae |
| 104 | *Cyperus longus* L. subsp. *longus* | Cyperaceae |
| 105 | *Lotus palustris* Willd. | Fabaceae |
| 106 | *Centaurium pulchellum* (Sw.) Druce | Gentianaceae |
| 107 | *Geranium pyrenaicum* Burm.f. | Geraniaceae |
| 108 | *Ajuga chamaepitys* (L.) Schreb. subsp.*chia* (Schreb.) | Lamiaceae |
| 109 | *Salvia verbenaca* L. | Lamiaceae |
| 110 | *Alopecurus myosuroides* Huds. subsp. *myosuroides* | Poaceae |
| 111 | *Bromus tectorum* L. | Poaceae |
| 112 | *Phleum exaratum* Griseb. subsp. *exaratum* | Poaceae |
| 113 | *Polygonum maritimum* L. | Polygonaceae |
| 114 | *Ranunculus repens* L. | Ranunculaceae |
| 115 | *Verbascum sinuatum* L. var. *sinuatum* | Scrophulariaceae |
